# Supplementary material for: Temperature-controlled ionic liquid dispersive liquid–liquid microextraction combined with fluorescence detection of ultra-trace Hg2+ in water
Source: Royal Society of Chemistry journal article supplement (doi:10.1039/c9ay00029a), 2019-01-01
Supplement: c9ay00029a1.pdf [file c9ay00029a1.pdf]

## Supplementary Material

### Temperature-controlled ionic liquid dispersive liquid-liquid microextraction combined with fluorescence detection of ultra-trace Hg<sup>2+</sup> in water

Yun Hui<sup>1,2,4</sup>, Chenyu Xiong<sup>1,2</sup>, Chao Bian<sup>1</sup>, Shilang Gui<sup>2,3</sup>, Jianhua Tong<sup>1</sup>, Yang Li<sup>1</sup>, Chengyao Gao<sup>1</sup>, Yanyan Huang<sup>3</sup>, William C. Tang<sup>4</sup>, Shanhong Xia<sup>1\*</sup>

<sup>1</sup> State Key Laboratory of Transducer Technology, Institute of Electronics, Chinese Academy of Sciences, Beijing 100190, China

<sup>2</sup> University of Chinese Academy of Sciences, Beijing 100190, China

<sup>3</sup> Beijing National Laboratory for Molecular Sciences, CAS Key Laboratory of Analytical Chemistry for Living Biosystems, Institute of Chemistry, Chinese Academy of Sciences, Beijing, 100190, China

<sup>4</sup> Department of Biomedical Engineering, University of California, Irvine, Irvine, CA, 92617, USA

\*Corresponding Author: Shanhong Xia, [shxia@mail.ie.ac.cn](mailto:shxia@mail.ie.ac.cn) Tel: + 86 10 58887180, fax: + 86 10 58887180

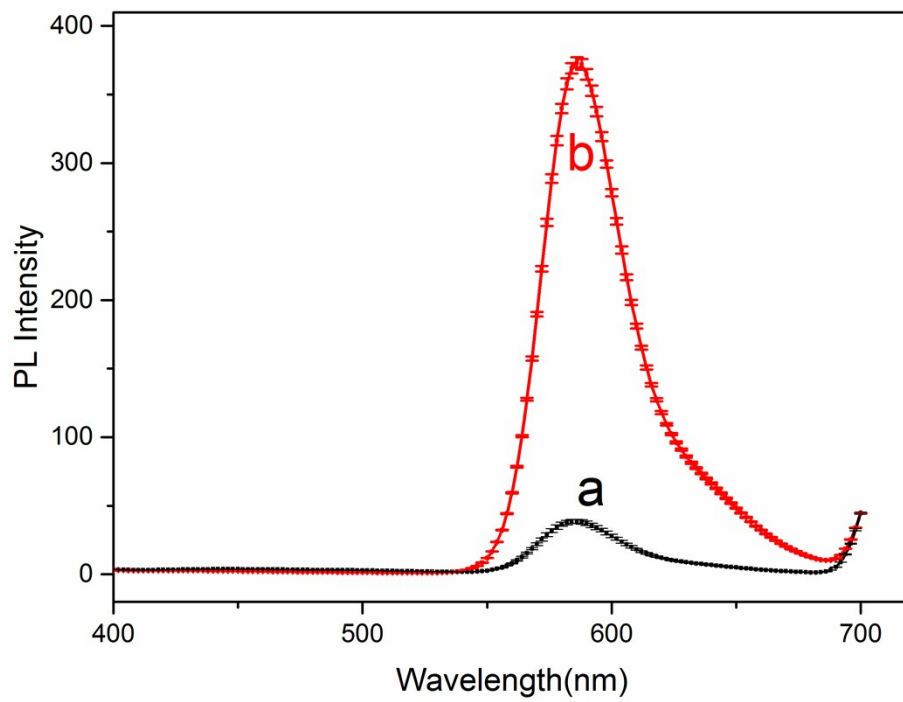

**Fig.S1.** The comparison of PL spectrum of mercury solution with 1% IL between the same day (a) and 16 days later (b).

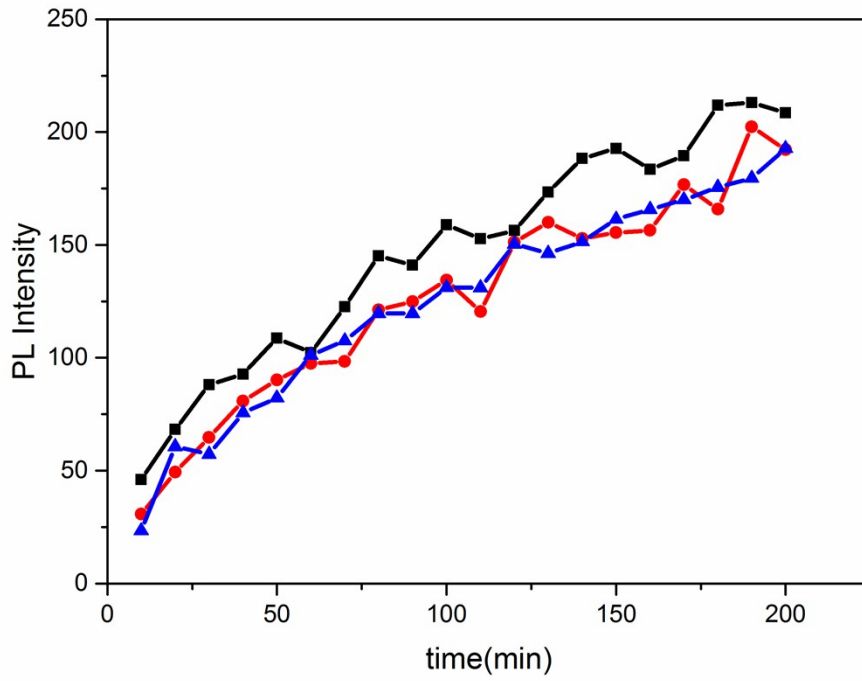

**Fig.S2.** The PL intensity of 10 $\mu$ M PTR in 20 $\mu$ M mercury solutions with 15% IL, 30% water fraction at 55 $^{\circ}$ C water bath.

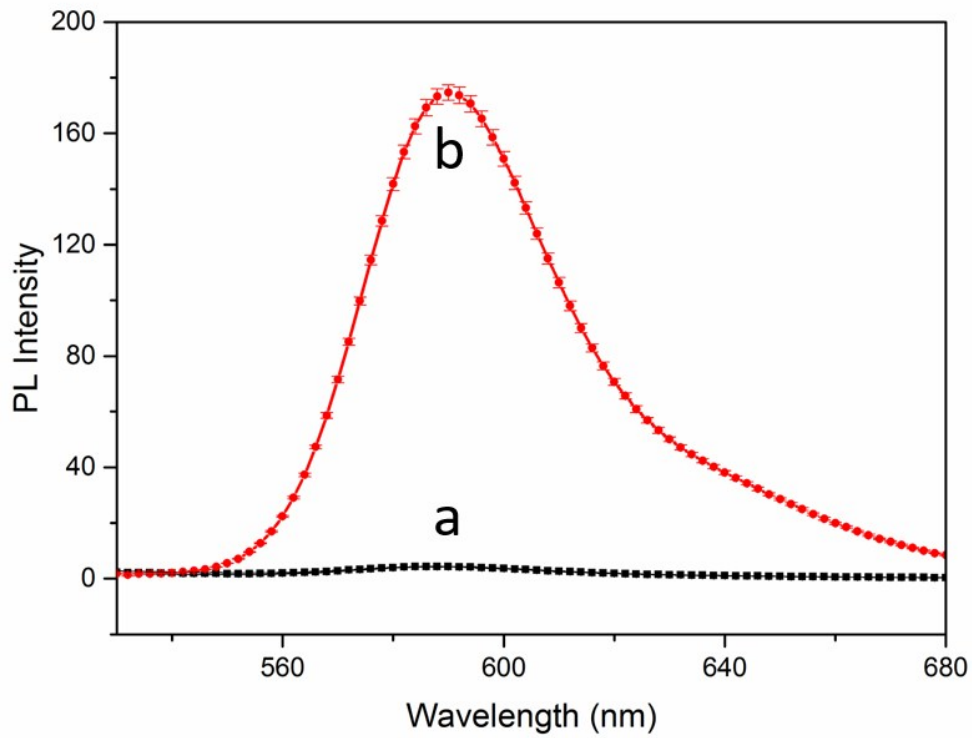

**Fig.S3.** The PL intensity of 10 $\mu$ M PTR in 0  $\mu$ M (a) and 10  $\mu$ M (b) mercury solutions with 15 IL%, 30% water fraction after 10-hour water bath at 55 $^{\circ}$ C.

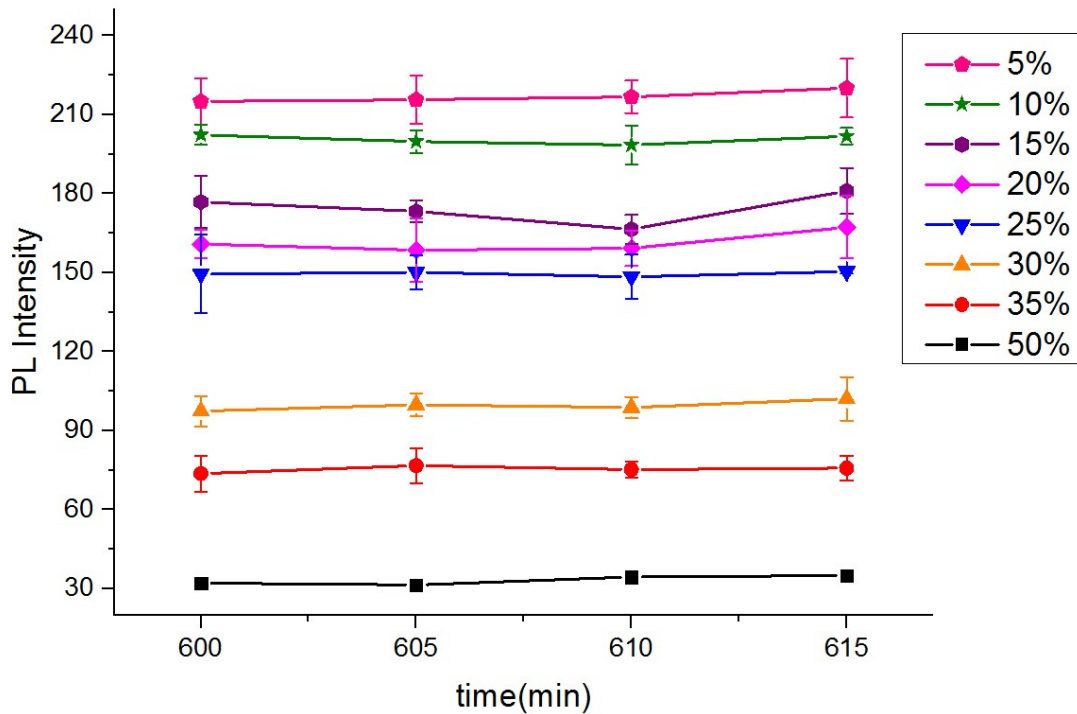

Fig.S4. The PL intensity difference between 10  $\mu\text{M}$  and 0  $\mu\text{M}$  mercury solutions with 10  $\mu\text{M}$  PTR, 30% water fraction, different IL% at 55  $^{\circ}\text{C}$  water bath.

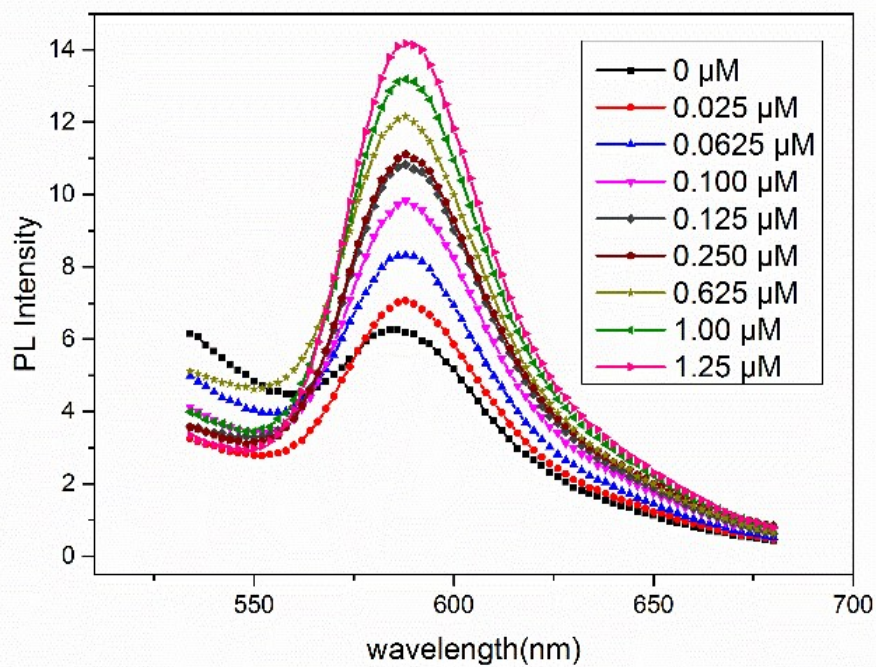

Fig.S5. Emission spectra of PTR in the presence of increasing concentrations of  $\text{Hg}^{2+}$  (0-1.25  $\mu\text{M}$ ) in 25% IL, ACN:  $\text{H}_2\text{O}$  (4:1, v/v), ex: 355nm.

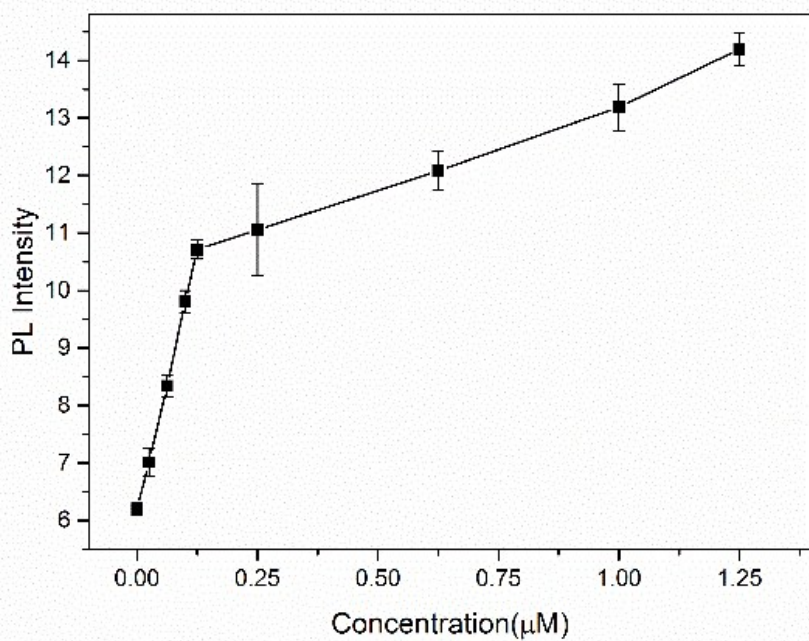

**Fig.S6.** Linear correlation between the PL intensity at 589.2nm and  $Hg^{2+}$  concentration. The linear equation was  $y = 36.395x + 6.1396$  ( $R^2 = 0.9991$ ) and  $y = 3.0282x + 10.278$  ( $R^2 = 0.9949$ ), respectively.
